# Supplementary material for: Histological Analysis, Bioinformatics Profile, and Expression of Methylenetetrahydrofolate Reductase (MTHFR) in Bovine Testes
Source: Preprints.org preprint supplement (doi:10.20944/preprints202008.0670.v1), 2020-08-30
Supplement: Supplementary file 1 [file supplementary]

Supplementary figures

Supplementary figures (SF)

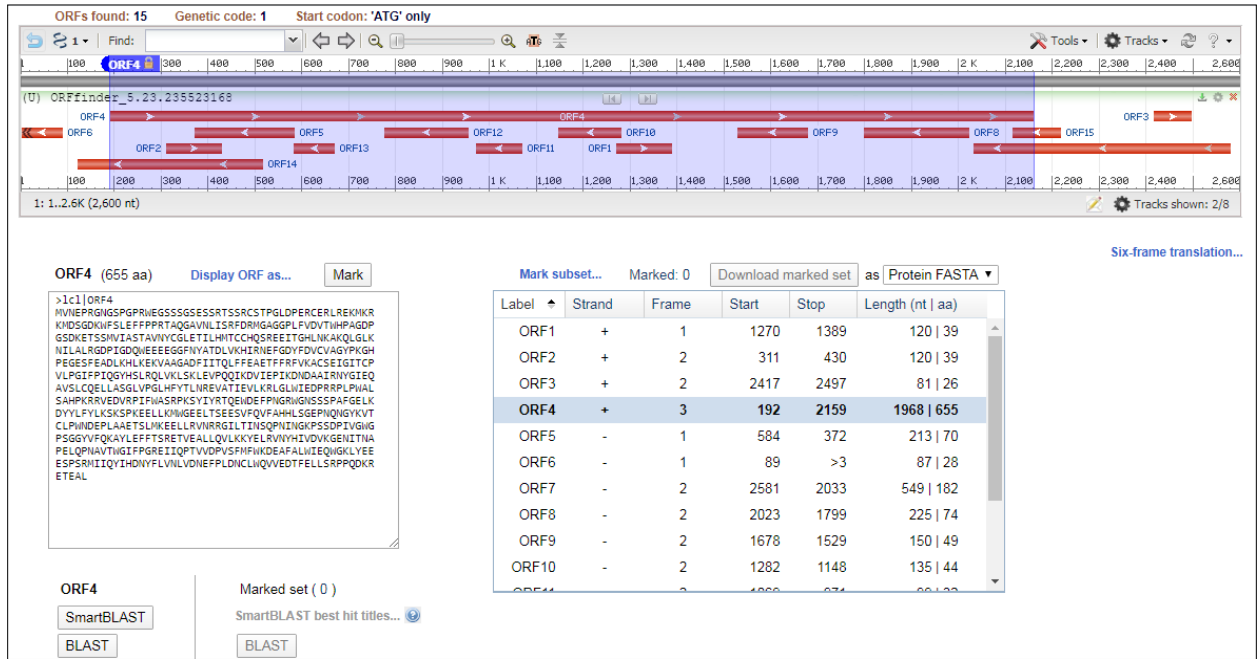

Supplementary figure 1. ORF analysis of yellow-cattle (*Bos taurus*) MTHFR sequence.

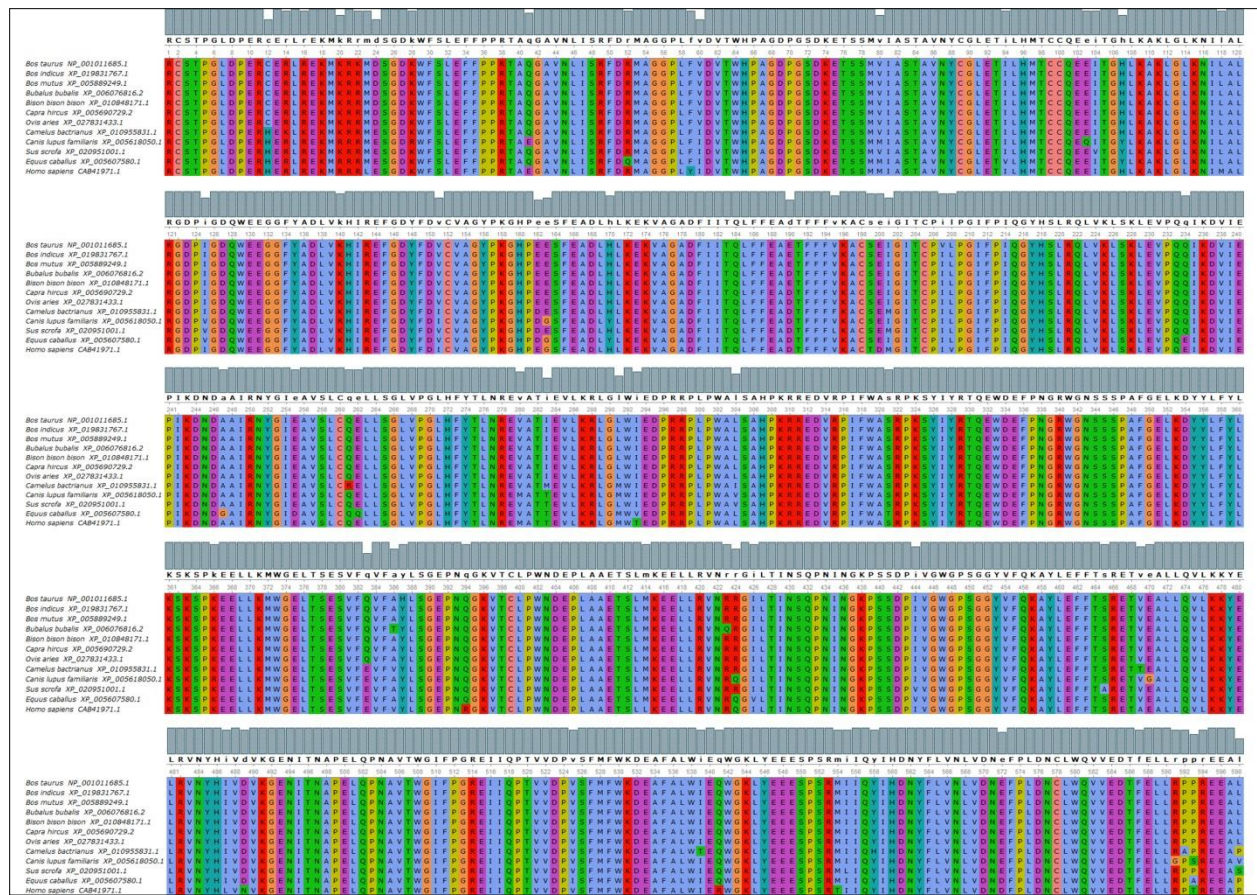

Supplementary figure 2. Multiple sequence alignment of amino acid sequences of closely related species

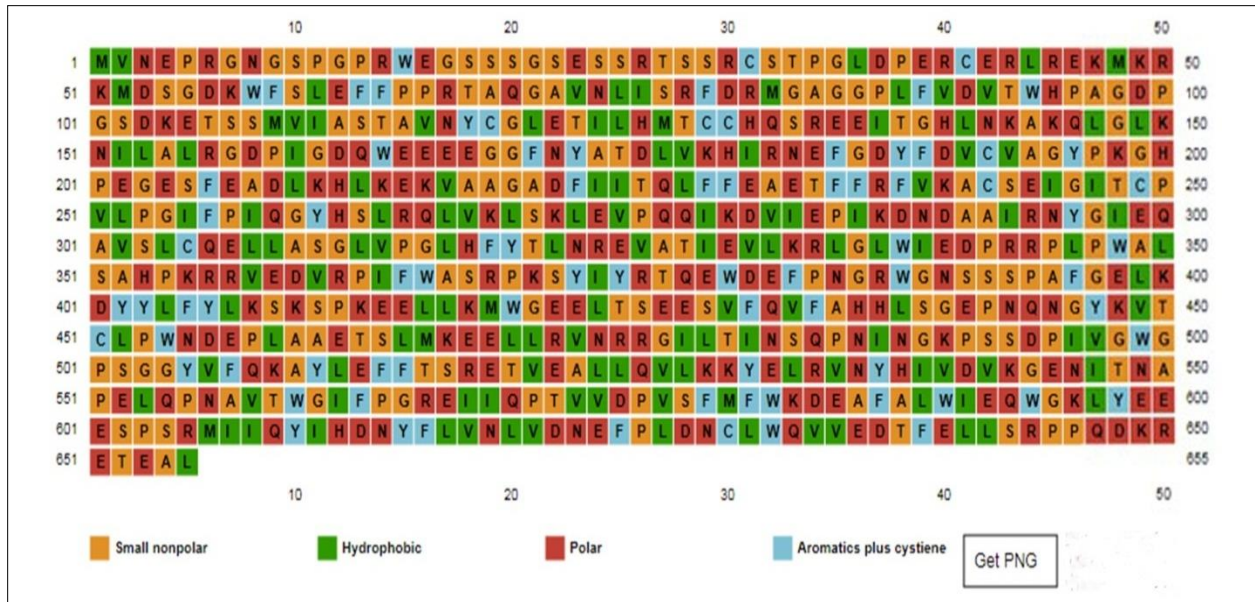

Supplementary figure 3. Aspects of the chemical composition of yellow-cattle MTHFR protein

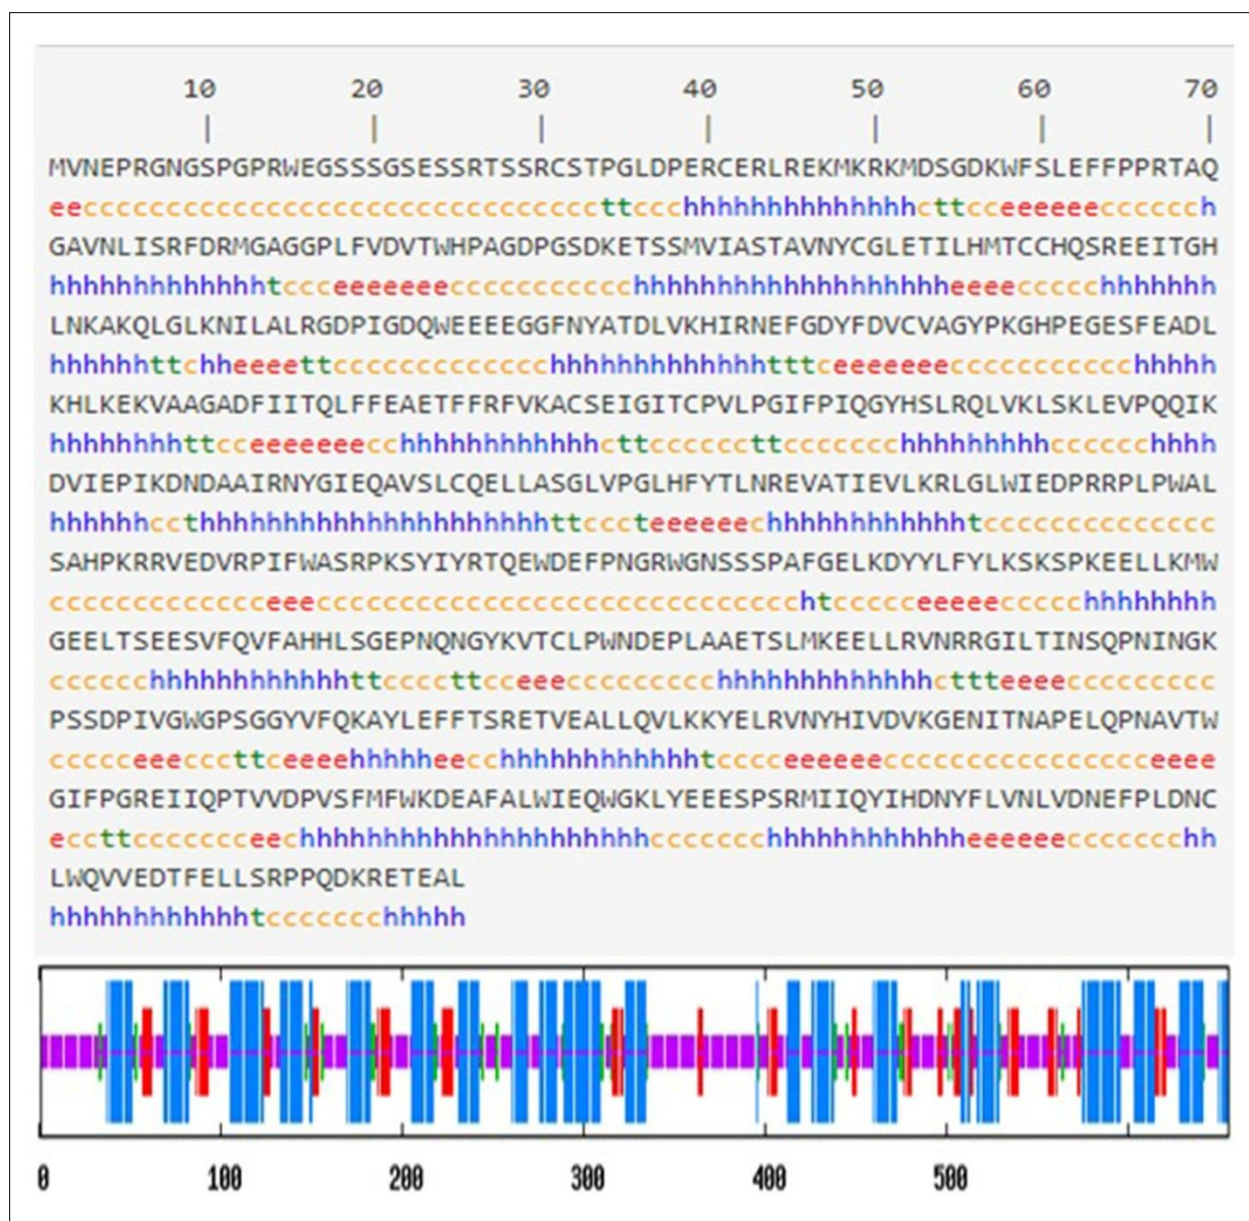

Supplementary figure 4. Predicted secondary structure of *Bos taurus* MTHFR. The long vertical zone: Alpha helix (h); The middle vertical zone: Extended strand (e); The short vertical zone: Random coil (c). The secondary structure was predicted by SOPMA online software
